# Supplementary material for: Comparative transcriptome and hormone analyses of roots in apple among three rootstocks with different rooting abilities
Source: PeerJ. 2024 Oct 14;12:e18244. doi: 10.7717/peerj.18244 (PMC11485133; doi:10.7717/peerj.18244)
Supplement: Supplemental Information 2 [file peerj-12-18244-s002.xlsx]

## Sheet: RNA sequencing Data
						The raw sequencing data have been submitted to the NCBI Sequence Read Archive (SRA) database (PRJ NA1066895)

## Sheet: Shoot length
	T2/HT		T2/J2		T2/G935
0d	53.75	2.22	22.75	0.96	45.25	2.87
30d	76.75	2.5	30.25	0.96	77.25	1.5
60d	98.75	3.59	45.75	2.99	99.25	6.99
90d	122	3.65	65.75	5.91	115	4.16
120d	139.25	3.59	109	4.9	139	3.65

## Sheet: root architecture
Volume	T2/HT		T2/J2		T2/G935
0d	18.66	0.29	4	0.79	7	0.53
30d	30.8	1.49	11.62	1.29	18.76	1.87
60d	55.59	1.11	13.76	1.06	32.91	1.52
90d	110.09	5.62	27.58	0.69	55.92	1.98
120d	128.5	4.74	39.51	1.23	61.92	2.32
Surface Area	T2/HT		T2/J2		T2/G935
0d	298.09	86.5	197.09	5.96	244.66	13.99
30d	836.28	8.82	281.11	28.03	688.27	29.48
60d	1793.56	45.07	299.44	7.49	1085.61	72.72
90d	2484.87	36.38	474.68	76.24	1750.13	50.49
120d	2938.33	44.29	767.49	29.56	2073.86	48.7
Average diameter	T2/HT		T2/J2		T2/G935
0d	0.73	0.08	0.62	0.1	0.62	0.05
30d	0.73	0.01	0.66	0.01	0.62	0.06
60d	0.86	0.04	0.71	0.01	0.73	0.02
90d	1.01	0.07	0.81	0.04	0.81	0.02
120d	1.05	0.02	0.97	0.06	0.92	0.04
Tips	T2/HT		T2/J2		T2/G935
0d	2335	216	669	29	2137	45
30d	6347	184	1409	301	4689	201
60d	9827	215	1527	46	6885	276
90d	13042	390	3070	127	8841	383
120d	14054	630	4096	311	9400	390
Forks	T2/HT		T2/J2		T2/G935
0d	5201	32	2750	46	4580	186
30d	8385	170	5470	339	8318	931
60d	11012	1964	6304	293	9643	396
90d	18156	831	9003	188	11058	491
120d	20831	834	10073	280	11862	714
Length	T2/HT		T2/J2		T2/G935
0d	1285.47	69.48	770.6	50.81	1118.14	91.13
30d	4765.04	89.45	1450.77	73.7	3516.37	95.18
60d	7511.69	128.1	1685.7	21.47	4531.72	128.21
90d	10531.7	395.23	3214.75	170.54	7274.82	254.14
120d	11544.1	466.82	4157.85	116.16	8540.91	281.13

## Sheet: plant hormones
Leaves								Roots
	T2/HT		T2/J2		T2/G935			T2/HT		T2/J2		T2/G935
ABA	62.13	0.49	68.26	0.27	62.3	0.79		22.95	0.79	30.49	0.5	24.53	0.33
IAA	T2/HT		T2/J2		T2/G935			T2/HT		T2/J2		T2/G935
	169.13	2.06	134.87	4.08	165.87	2.34		137.74	0.45	83.66	0.26	116.02	0.3
	T2/HT		T2/J2		T2/G935			T2/HT		T2/J2		T2/G935
GA3	17.95	0.23	15.76	0.1	17.67	0.25		19.86	0.08	16.75	0.18	18.11	0.08

## Sheet: q-PCR
MD00G1000200				MD00G1001500				MD00G1003500				MD00G1007800
	FPKM	qRT-PCR			FPKM	qRT-PCR			FPKM	qRT-PCR			FPKM	qRT-PCR
T2/HT	2.18	2.05		T2/HT	12.39	5.88		T2/HT	19.8	9.76		T2/HT	50.67	20.88
T2/J2	0.73	0.81		T2/J2	7.64	1.99		T2/J2	9.07	2.13		T2/J2	31.34	11.25
MD00G1000200				MD00G1001500				MD00G1003500				MD00G1007800
	FPKM	qRT-PCR			FPKM	qRT-PCR			FPKM	qRT-PCR			FPKM	qRT-PCR
T2/HT	2.18	2.49		T2/HT	12.39	5.88		T2/HT	19.8	9.76		T2/HT	50.67	20.88
T2/G935	0.4	0.56		T2/G935	5.14	1.25		T2/G935	45.33	18.5		T2/G935	24.08	9.46
MD00G1000200				MD00G1001500				MD00G1003500				MD00G1007800
	FPKM	qRT-PCR			FPKM	qRT-PCR			FPKM	qRT-PCR			FPKM	qRT-PCR
T2/J2	0.73	0.81		T2/J2	7.64	1.99		T2/J2	9.07	2.13		T2/J2	31.34	11.25
T2/G935	0.4	0.56		T2/G935	5.14	1.25		T2/G935	45.33	18.5		T2/G935	24.08	9.46
